1           **Empowering Healthcare Professionals in West Africa □ A Feasibility Study and**  
2           **Qualitative Assessment of a Dietary Screening Tool to Identify Adults at High Risk of**  
3                                           **Hypertension**  
4

5           **Nimisoere P. Batubo<sup>1</sup>, Nnenna M. Nwanze<sup>2</sup>, Chizindu A. Alikor<sup>3</sup>, Carolyn I. Auma<sup>1</sup>, J.**  
6           **Bernadette Moore<sup>1</sup>, and Michael A. Zulyniak<sup>1\*</sup>**  
7

8           **Affiliates:**

9           <sup>1</sup>Nutritional Epidemiology Group, School of Food Science and Nutrition, University of  
10           Leeds, Leeds, LS2 9JT.

11  
12           <sup>2</sup>Department of Family Medicine, Rivers State University/Rivers State University of  
13           Teaching Hospitals, Port Harcourt, Rivers State, Nigeria.

14  
15           <sup>3</sup>Department of Internal Medicine, Rivers State University/Rivers State University of  
16           Teaching Hospitals, Port Harcourt, Rivers State, Nigeria.  
17

18           \***Corresponding author:**

19           [m.a.zulyniak@leeds.ac.uk](mailto:m.a.zulyniak@leeds.ac.uk) (MAZ)  
20

21           **Trial registration:** *ClinicalTrials.gov*: NCT05973760. Registered August 3<sup>rd</sup>, 2023  
22

23           **Funding:** This study was funded by the Tertiary Education Trust Fund (TETFund) of  
24           Nigeria. MAZ is currently funded by Wellcome Trust (217446/Z/19/Z). The funders do not  
25           have any role in any aspect of this study.  
26

27           **Competing interests:** There are no conflicts of interest.  
28

29           **Roles and Responsibilities Authors:**

30           NPB and MAZ collaborated on the research methodology design. NPB led the trial, and  
31           NMN and CAA provided technical support. NPB led the analysis and prepared the first draft.  
32           MAZ and JBM provided analytical expertise. MAZ, JBM, and CIA provided critical  
33           feedback. NPB revised the manuscript. All authors approved the final manuscript.  
34  
35  
36  
37

38 **Abstract**

39 **Background:** Dietary risks significantly contribute to hypertension in Nigeria. Food  
40 frequency questionnaires (FFQs) can provide valuable dietary assessment but require  
41 rigorous validation and careful design to facilitate usability. This study assessed the feasibility  
42 and potential effectiveness of implementing a clinical screening tool for identifying adults at  
43 high risk of hypertension in West Africa.

44

45 **Materials and methods:** 58 consenting adult patients with hypertension and  
46 their caregivers and 35 healthcare professionals from a single-centre Nigerian hospital were  
47 recruited to complete a 27-item FFQ at two-time points and three 24-hour recalls for  
48 comparison in a mixed method study employing both quantitative questionnaires and  
49 qualitative techniques to elicit free form text. Data analyses were conducted using R software  
50 version 4.3.1 and NVivo version 14. The trial was registered with *ClinicalTrials.gov*:  
51 NCT05973760.

52

53 **Results:** The mean age of patients was  $42.6 \pm 11.9$  years, with an average SBP of  $140.3$   
54  $\pm 29.8$  mmHg and a BMI of  $29.5 \pm 7.1$  Kg/m<sup>2</sup>. The adherence rate was 87.9%, and the mean  
55 completion time was 7:37 minutes. 96.6% of patients found the FFQ easy to complete,  
56 comprehensive, and valuable. A minority reported difficulty (3.4%), discomfort (10.3%), and  
57 proposed additional foods (6.9%). Healthcare professionals considered the screening tool  
58 very important (82.9%) and expressed a willingness to adopt the tool, with some suggestions  
59 for clarification. Patients and healthcare professionals found the screening tool favourable for  
60 nutritional counselling in hypertension care.

61

62 **Conclusion:** The tailored screening tool (FFQ) demonstrated promising feasibility for  
63 integration into clinical care as assessed by patients and healthcare professionals. Successful  
64 implementation may benefit from proactive time management and addressing training needs.  
65 This user-centred approach provided key insights to refine FFQ and set the foundation for  
66 ongoing validity testing and evaluation in clinical practice.

67

68 **Keywords:** Food frequency questionnaire, feasibility study, hypertension risk, screening tool,  
69 West Africa

70

## 71 **1. Introduction**

72 Hypertension, defined as sustained high blood pressure above systolic blood pressure  $\geq 140$   
73 mmHg and diastolic blood pressure  $\geq 90$  mmHg, is the leading preventable risk factor for  
74 cardiovascular disease and the number one cause of death globally, responsible for over 10  
75 million deaths annually (1). Approximately 40% of people aged 30-79 years have  
76 hypertension, with two-thirds of cases living in low- and middle-income countries, including  
77 African countries (WHO, 2021). Sub-Saharan Africa experiences a disproportionately high  
78 hypertension burden, with prevalence estimates ranging from 19% to 50% in adults (2, 3).  
79 The most recent data estimate a 17% increase in hypertension rates in Nigeria from 2010 to  
80 2019 (4-6) and highlight that awareness, treatment, and control of hypertension remain  
81 suboptimal, with  $<30\%$  of hypertensive adults in Nigerian managing to control their blood  
82 pressure (7, 8). This trend has been linked to poor healthcare access, high medication costs,  
83 and non-adherence to anti-hypertensive medications (9).

84

85 Unhealthy diets are a major modifiable risk factor for hypertension in Nigeria and globally  
86 (1, 10, 11). Our previous work reported that frequent intakes of diets high in salt, red meat,  
87 processed foods, fried foods, fat, and alcohol were associated with an increased likelihood of  
88 hypertension in Nigeria and other West African countries (12). In contrast, higher fruit and  
89 vegetable consumption appeared protective against hypertension. These findings provide  
90 region-specific evidence that unhealthy foods raise hypertension likelihood in West Africa. In  
91 2018, the Nigerian Government estimated an average daily salt consumption of 10 grams/day  
92 among adults in Nigeria, which is approximately twice as high as WHO's recommendation of  
93  $\leq 5$  grams (13). Nigerian diets traditionally contain high sodium from added salt, bouillon  
94 cubes, salted-dried fish and salted-dried meat, with intakes increasing further from processed,  
95 restaurant, and fast foods (13-15). Therefore, optimising nutrition by encouraging restriction

96 of sodium, processed and fried foods, and increased intake of fruits/vegetables, nuts/legumes,  
97 lean proteins, and healthy fats constitutes a vital component of hypertension prevention and  
98 treatment (9).

99

100 One of the key challenges in addressing hypertension in West African countries lies in the  
101 timely identification of individuals at high-risk (8). Limited tools for healthcare services,  
102 inadequate screening programs, and low awareness levels among the population contribute to  
103 delayed diagnosis and intervention (3, 16). In most cases, healthcare professionals are unable  
104 to capture a snapshot of the foods being consumed by their patients. Conversely, their patients  
105 are unaware that the foods they're consuming are putting them at risk of hypertension until  
106 the condition progresses to a critical stage and they receive guidance.

107

108 Early identification of individuals at high risk of hypertension is paramount in mitigating its  
109 impact on public health (17). Healthcare professionals play a pivotal role in the early  
110 identification and management of hypertension (17). Their interactions with patients in  
111 clinical settings provide a crucial opportunity for early identification and intervention (3).  
112 However, the effectiveness of healthcare professionals in identifying individuals at high risk  
113 depends significantly on the availability of suitable screening tools that are both culturally  
114 sensitive and contextually appropriate (18). Therefore, timely intervention through accurate  
115 screening is critical for preventing the progression of chronic diseases and reducing  
116 associated morbidity and mortality rates (17, 19, 20).

117

118 Dietary assessment represents an essential first step for establishing the association between  
119 diet and disease and designing effective nutrition interventions for chronic conditions,  
120 including hypertension (21). Evidence suggests that culturally tailored food frequency

121 questionnaires (FFQs) can improve validity and accuracy compared to non-specific tools (22-  
122 24). In West African countries, including Nigeria, cultural norms, dietary practices, and  
123 lifestyle patterns can influence the presentation and management of hypertension (25).  
124 Considering these challenges, it is imperative to develop and evaluate a screening tool  
125 specifically tailored to the cultural specificities of the African region. These tools should be  
126 acceptable, comprehensible, and non-burdensome for healthcare professionals and patients  
127 (18, 26).

128

129 The integration of validated screening tools into clinical care has the potential to augment  
130 disease risk assessment, improve patient counselling, and enhance treatment outcomes (27).  
131 Nevertheless, implementing screening tools within clinical settings has been constrained,  
132 primarily due to inadequate healthcare professional training, data interpretation challenges,  
133 lack of integration into electronic health records (EHRs) and clinical workflows, and time  
134 constraints (28, 29). To surmount these implementation barriers, it is imperative to ensure that  
135 (i) a study is designed to minimise the risk of bias and (ii) the tools and methods used are  
136 acceptable and appropriate for all participants (i.e., healthcare professionals and patients)  
137 before evaluating the efficacy of the tool itself. Therefore, this study aimed to assess the  
138 feasibility and opinions of a culturally tailored dietary screening tool in a clinical setting in  
139 Nigeria to screen individuals at risk of hypertension.

140

## 141 **2. Materials and Methods**

### 142 **2.1. Study design and setting**

143 This study utilised a single-centre, cross-sectional feasibility study with a mixed methods  
144 design combining quantitative and qualitative approaches to evaluate the acceptability,  
145 practicality, and perceived utility of implementing a screening tool for dietary assessment in

146 routine clinical practice for hypertension management. The study was conducted in the  
147 outpatient (Family Medicine and Internal Medicine) clinics of Rivers State University  
148 Teaching Hospital, Port Harcourt, Rivers State, Nigeria. Patients interested in the study were  
149 referred directly by healthcare professionals to the study team or through recruitment fliers  
150 and posters. Eligibility was determined using a structured questionnaire (**Table 1**). Eligible  
151 patients were then allocated to either hypertension or non-hypertension categories. The study  
152 lasted for 4 weeks. We adhered to SPIRIT guidelines for reporting clinical trials (30).

153

154 **Table 1:** Inclusion and exclusion criteria

| Inclusion criteria                                                                                                                                                                                                                                                                                     | Exclusion criteria                                                                                                                                                                                                                                                                                                                                                                                                                             |
|--------------------------------------------------------------------------------------------------------------------------------------------------------------------------------------------------------------------------------------------------------------------------------------------------------|------------------------------------------------------------------------------------------------------------------------------------------------------------------------------------------------------------------------------------------------------------------------------------------------------------------------------------------------------------------------------------------------------------------------------------------------|
| Age between 18 and 70 years<br>Men and women<br><br>Hypertensive or non-hypertensive individual<br><br>Individuals who have been residents in Nigeria for the past 2 years.<br>Ability to read, write, and communicate over the phone in English<br>Individuals who gave their consent to participate. | Individuals < 18 years or > 70 years of age<br>Pregnant women or intend to become pregnant or breastfeeding woman<br>Diagnosis of other chronic diseases such as cancer, diabetes, renal failure, endocrine diseases, and previous and recent history of cardiovascular disease (CVD) and stroke.<br><br>Individuals on dietary restriction or recent changes to their diet or food<br>Individuals who are currently enrolled in other studies |

155

156

## 157 **2.2. Participant recruitment**

158 The patients were recruited during routine clinic visits over 4 weeks between June and July  
159 2023 through recruitment posters displayed in key areas of the hospital, clinician referrals,  
160 and engaging discussions during morning briefing sessions where vital signs are taken from  
161 patients in the internal medicine and family medicine departments of RSUTH. The healthcare  
162 professionals identified eligible participants based on study criteria and informational posters  
163 and referred interested participants to the study team for further screening. In total, 90  
164 patients expressed interest in the study and were screened for eligibility, which yielded 66

165 patients. Additionally, 35 healthcare professionals were recruited through informational files  
166 distributed in the hospital and presentations at clinic meetings. The healthcare professionals  
167 gave written informed consent to provide qualitative feedback on the screening tools.

168

### 169 **2.3. Ethics approval and informed consent**

170 The study protocol was submitted to the following ethics boards. Business, Earth &  
171 Environment, Social Sciences (AREA FREC) Committee, University of Leeds, Leeds, United  
172 Kingdom on 21<sup>st</sup> March 2023, and the Rivers State University Teaching Hospital Research  
173 Ethics Committee in Port Harcourt, Nigeria on 20<sup>th</sup> March 2023 and granted final approval  
174 with the approval number: 0484 on 28/04/2023 and approval number: RSUTH/REC/2023316  
175 on 30/03/2023 respectively. All participants provided informed consent to participate in this  
176 research study. The trial was registered at [clinicaltrials.gov](https://clinicaltrials.gov) (Trial Registration:  
177 NCT05973760).

178

### 179 **2.4. Eligible participants**

180 Eligible participants were adults between the ages of 18-70 years, including both men and  
181 women, who were resident in Nigeria for at least two years and could read, write, and  
182 communicate in English. Both hypertensive and non-hypertensive individuals were eligible,  
183 provided they did not have dietary restrictions or recent diet changes, were free from cancer,  
184 diabetes, renal failure, endocrine disorders, previous cardiovascular disease, or stroke, and  
185 were not enrolled in other studies. The full inclusion and exclusion criteria are presented in  
186 **Table 1**. Before enrolment, each participant read a simplified version of the participant  
187 information sheet and was provided an opportunity to ask questions of the study staff to  
188 ensure informed consent to participate in the study.

189

190 **2.5. Study protocol**

191 The study was a single-cantered feasibility study conducted among adult outpatients (Family  
192 Medicine and Internal Medicine) clinics of the Rivers State University Teaching Hospital in  
193 Nigeria between July 2023 and August 2023. Participants were seen at a screening visit 1-4  
194 weeks to assess eligibility per established inclusion/exclusion criteria before the dietary  
195 assessment (**Table 1**). If eligibility criteria were met, the patients were allocated into  
196 hypertensive and normotensive groups based on their history of hypertension, and informed  
197 consent was obtained from participants. The feasibility of the screening tool was evaluated in  
198 a small number of participants ( $n=101$ ) consisting of 66 patients and 35 healthcare  
199 professionals (**Fig 1**).



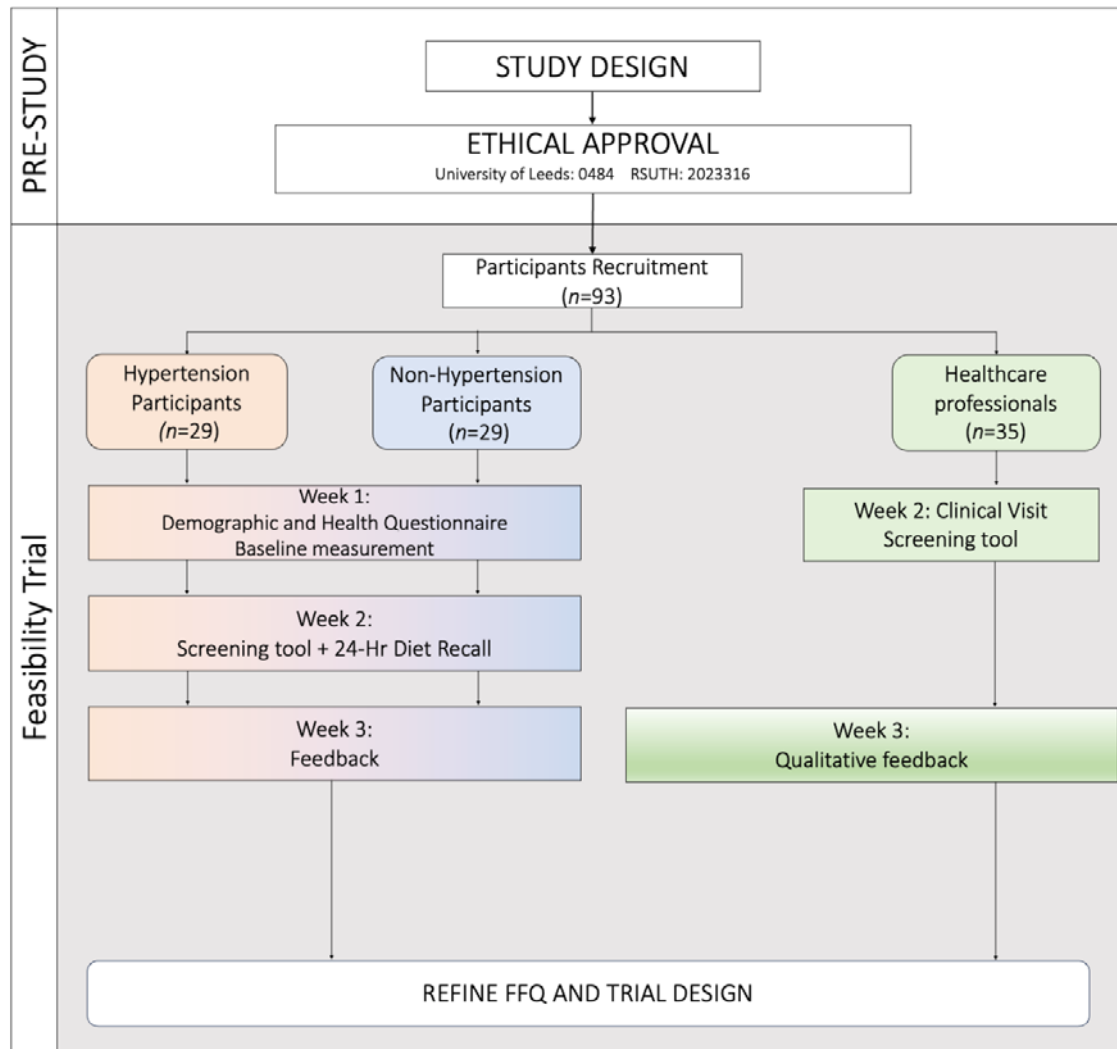

200

201 **Fig 1. Participant selection and sequence of assessments flowchart.** FFQ: food frequency  
202 questionnaire, 24 HR: 24-hour dietary recalls, BP: Blood pressure, H: Height, W: Weight.

203

204 In the week 1 post-allocation study visit, participants underwent baseline assessments  
205 consisting of demographic and health questionnaires, anthropometric measurements (height  
206 and weight), and blood pressure evaluation. The participant's height and body weight were  
207 measured two times using a standard stadiometer (model number: DG2301, China). The body  
208 mass index (BMI) was calculated from the measurement of the height and body weight of  
209 each patient. The participant's blood pressure was measured two times in the non-dominant

210 arm using an automated mercury sphygmomanometer (model number: ZK-BB68, Shenzhen,  
211 China).

212

213 On the second study visit, eligible patients and healthcare professionals filled out the  
214 screening tools (27-item semi-quantitative food frequency questionnaire) (**S1 Table**).  
215 Alongside the screening tool, the first 24-hour dietary recall (24HR) was used to garner  
216 dietary intake data from the patients. Finally, on the third study visit, eligible patients and  
217 healthcare professionals completed a one-time survey examining the completion rates, clarity  
218 of questions, ease of use, cultural appropriateness and difficulty encountered while answering  
219 the questions. Additionally, the healthcare professionals provide qualitative feedback on the  
220 clinical relevance, their perceptions surrounding the integration of the screening tool into  
221 clinical practice and the potential impact of the screening tool on patient care in Nigerian  
222 healthcare settings and suggest improvements to optimise the questionnaire's effectiveness  
223 for the prevention and dietary management of hypertension. The healthcare professional's  
224 survey was adapted from previous studies on clinical adoption of health technologies (31).  
225 Questions utilised a 5-point Likert-type scale and open-ended formats.

226

## 227 **2.6. The screening tool (FFQ)**

228 The screening tool for this study was a semi-quantitative food frequency questionnaire (FFQ)  
229 containing 27 food groups covering common Nigerian foods and dishes informed by our  
230 previous systematic review and meta-analysis on dietary factors associated with hypertension  
231 in West Africa (12) and the Nigerian national nutrition guidelines on non-communicable  
232 disease prevention (32) (**S1 Table**). For each food group, participants reported consumption  
233 frequency 'on a typical week' over the past month or so, and answers corresponded to one  
234 out of four options, with categories ranging from 'rarely or never', '1-2 times/week', '3-5

235 times/week’, ‘daily’, and ‘more than once per day’. Additional questions related to salt intake  
236 behaviour were appended to the FFQ. The FFQ was self-administered. According to the  
237 Flesch-Kincaid scale, the reading level was at a 6th-grade level (33).

238

## 239 **2.7. Participant compensation**

240 Patients and healthcare professionals received a gift card incentive of £5 (approximately  
241 £6,000) after completing the third study visit involving the FFQ and surveys. Healthcare  
242 professionals received a gift card incentive of £5 (£6,000) upon completing the one-time  
243 feasibility and perceptions survey about the screening tool.

244

## 245 **2.8. Sample size**

246 The target sample size was 50 patients allocated into hypertensive and non-hypertensive  
247 groups, with a ratio of 1:1 between groups. This was estimated based on published  
248 recommendations for feasibility studies and qualitative research to allow for sufficient power  
249 for the validation analyses and achieving thematic saturation for qualitative feedback (34-  
250 37), (38) and was adjusted to account for up to a 20% dropout rate (39, 40). For healthcare  
251 professionals providing qualitative feedback, a sample of 25 was deemed adequate.

252

## 253 **2.9. Statistical analysis**

254 The quantitative and qualitative analyses were conducted in R version 4.3.1 (41) and NVivo  
255 version 14 (42), respectively. The quantitative data were exported to R statistical software and  
256 analysed using descriptive statistics, including frequencies, means, and standard deviations.  
257 Results of paired t-tests indicated whether, on average, there were differences between men  
258 and women. Completion rates, retention and adherence were analysed as percentages. The  
259 mean completion time between the first and second visits was calculated. Patient and

260 healthcare professionals' responses to 5-point Likert scale questions were analysed as means  
261 and standard deviations.

262

263 Qualitative responses from the healthcare professionals underwent thematic analysis to  
264 identify common themes through an iterative process and stepwise process of open coding,  
265 categorisation, and consensus building among analysts (43, 44). First, the qualitative  
266 feedback from healthcare professionals, which was collected through open-ended  
267 questionnaires and interviews, transcribed verbatim, was entered into Microsoft Excel for  
268 organisation by participant group. The responses were then imported into NVivo 14  
269 qualitative analysis software (42) for thematic analysis. This followed an iterative process,  
270 which involved initial open-coding to extract broad themes, focused-coding to categorise  
271 responses under identified themes, constant comparison between groups, and saturation  
272 assessment. Two independent coders analysed the data to enhance rigour. Through consensus  
273 building, themes and sub-themes related to feasibility, usability, cultural appropriateness,  
274 limitations, and integration considerations emerged. The themes were quantified by  
275 calculating the percentage of participants mentioning each theme. Representative quotes were  
276 identified. The results were reported as mean  $\pm$  SD and median for continuous data and  $n$  (%)  
277 for categorical data, and  $p$ -values  $<0.05$  were considered statistically significant.

278

### 279 **3. Results**

#### 280 **3.1. Patient's feasibility outcomes**

##### 281 **3.1.1. Patient's characteristics**

282 Ninety patients were initially screened; 66 met the inclusion criteria, provided informed  
283 consent, and enrolled in the study. Twenty-four patients were excluded (10 were on dietary  
284 restriction, 6 had a recent change of diet, and 8 were aged less than 18 years). After

285 exclusions, 58 patients completed the study, including 40 women (69%) and 18 men (31%).  
 286 Eight patients were excluded due to incomplete FFQ data (**Fig 2**). The mean age was  $42.6 \pm$   
 287  $11.9$  years, with males averaging  $40.5 \pm 12.1$  years and females  $43.5 \pm 11.8$  years. Educational  
 288 levels ranged from primary schooling (3.4%) to postgraduate degrees (24.1%). Regarding  
 289 marital status, 67.2% were married, 31.0% were single, and 1.7% were widowed.  
 290 Employment displayed diversity, with 24.1% self-employed and 37.9% in government  
 291 positions. Over half (55.2%) reported a family history of hypertension, indicating a potential  
 292 inherited predisposition. Additionally, 50% had hypertension, varying from under one year  
 293 (31.0%) to over five years (41.4%). Only 22 (75.9%) of the 29 patients with hypertension  
 294 were on antihypertensive medications (**Table 2**).

295

296 **Table 2: Sociodemographic characteristics of patients (n=58)**

| Characteristics                        | Overall         | Men             | Women           |
|----------------------------------------|-----------------|-----------------|-----------------|
| Age (years), mean $\pm$ SD             | 42.6 $\pm$ 11.9 | 40.5 $\pm$ 12.1 | 43.5 $\pm$ 11.8 |
| Sex, n (%)                             | 58 (100)        | 18 (31.0)       | 40 (69.0)       |
| Education n (%)                        |                 |                 |                 |
| Primary                                | 2 (3.4)         | 0               | 2 (3.40)        |
| Secondary                              | 12 (20.7)       | 2 (3.45)        | 10 (17.20)      |
| High school                            | 4 (6.9)         | 2 (3.45)        | 2 (3.45)        |
| University                             | 26 (44.8)       | 9 (15.50)       | 17 (29.30)      |
| Postgraduate                           | 14 (24.1)       | 5 (8.62)        | 9 (15.50)       |
| Marital status, n (%)                  |                 |                 |                 |
| Married                                | 39 (67.2)       | 10 (17.2)       | 29 (50.0)       |
| Single                                 | 18 (31.0)       | 8 (13.8)        | 10 (17.2)       |
| Widow                                  | 1 (1.7)         | 0               | 1 (1.7)         |
| Employment, n (%)                      |                 |                 |                 |
| Homemaker                              | 3 (5.2)         | 0               | 3 (5.2)         |
| Student                                | 3 (5.2)         | 1 (1.7)         | 2 (3.5)         |
| Unemployed                             | 3 (5.2)         | 0               | 3 (5.2)         |
| None-paid                              | 1 (1.7)         | 0               | 1 (1.7)         |
| Self-employed                          | 14 (24.1)       | 2 (3.5)         | 12 (20.7)       |
| Non-governmental                       | 9 (15.5)        | 3 (5.2)         | 6 (10.3)        |
| Government                             | 22 (37.9)       | 10 (17.2)       | 12 (20.7)       |
| Retired                                | 3 (5.2)         | 1 (1.7)         | 2 (3.5)         |
| Family history of Hypertension, n (%)  |                 |                 |                 |
| No                                     | 26 (44.8)       | 10 (17.2)       | 16 (27.6)       |
| Yes                                    | 32 (55.2)       | 8 (13.8)        | 24 (41.4)       |
| Hypertension n (%)                     |                 |                 |                 |
| No                                     | 29 (50.0)       | 9 (15.5)        | 20 (34.5)       |
| Yes                                    | 29 (50.0)       | 9 (15.5)        | 20 (34.5)       |
| Years of hypertension n (%)            |                 |                 |                 |
| < 1 year                               | 9 (31.0)        | 3 (5.2)         | 7 (12.1)        |
| 1-5 years                              | 8 (27.6)        | 2 (3.5)         | 5 (8.6)         |
| > 5 years                              | 12 (41.4)       | 3 (5.2)         | 9 (15.5)        |
| Antihypertensive medications use n (%) |                 |                 |                 |

|     |           |          |           |
|-----|-----------|----------|-----------|
| No  | 7 (24.1)  | 2 (6.9)  | 5 (17.2)  |
| Yes | 22 (75.9) | 6 (20.7) | 16 (55.2) |

297 Data are presented as:  $n$ = frequency, %= percentage, mean  $\pm$  SD= Standard deviation  
 298

299 **Table 3.** presents the cross-sectional measurements of the patients. On average, the patients  
 300 had a body weight of  $79.4 \pm 17.2$  kg. Men weighed more, with an average of  $87.3 \pm 19.0$   
 301 kilograms, compared to women, who averaged  $75.8 \pm 15.2$  kilograms. The overall height  
 302 averaged  $1.65 \pm 0.1$  meters, with males being taller at  $1.77 \pm 0.1$  meters as opposed to  
 303 females, whose height averaged at  $1.60 \pm 0.1$  meters. The mean Body mass index (BMI)  
 304 calculated was  $29.5 \pm 7.1$  kg/m<sup>2</sup>. The average systolic and diastolic blood pressure were  
 305  $140.3 \pm 22.9$  mmHg and  $87.4 \pm 17.3$  mmHg, respectively, across all patients. Male patients  
 306 had slightly higher mean systolic ( $143.3 \pm 24.7$ mmHg) and diastolic ( $90.5 \pm 19.6$  mmHg)  
 307 pressures compared to female patients ( $138.9 \pm 23.8$  mmHg and  $86.0 \pm 16.2$  mmHg,  
 308 respectively).

309

310 **Table 3: Cross-sectional measurements of patients (n=58)**

| Characteristics                      | Overall          | Men              | Women            | p-value |
|--------------------------------------|------------------|------------------|------------------|---------|
| Height (m)                           | $1.65 \pm 0.1$   | $1.77 \pm 0.1$   | $1.60 \pm 0.1$   | <0.001  |
| Body weight (kg)                     | $79.4 \pm 17.2$  | $87.3 \pm 19.0$  | $75.8 \pm 15.2$  | 0.032   |
| Blood pressure                       |                  |                  |                  |         |
| SBP (mmHg)                           | $140.3 \pm 29.8$ | $143.3 \pm 24.7$ | $138.9 \pm 23.8$ | 0.525   |
| DBP (mmHg)                           | $87.4 \pm 17.3$  | $90.5 \pm 19.6$  | $86.0 \pm 16.2$  | 0.397   |
| Body mass index (kg/m <sup>2</sup> ) | $29.5 \pm 7.1$   | $28.2 \pm 5.9$   | $29.6 \pm 7.5$   | 0.364   |
| Completion Time                      |                  |                  |                  |         |
| Mean                                 | $7.37 \pm 2.28$  |                  |                  |         |
| First visit                          | $7.71 \pm 2.51$  | $7.83 \pm 2.71$  | $7.65 \pm 2.46$  | 0.808   |
| Second visit                         | $7.03 \pm 2.03$  | $7.33 \pm 1.64$  | $6.90 \pm 2.18$  | 0.408   |

311 Data are presented as: mean  $\pm$  SD=standard deviation

312 p-value between men and women at  $p < 0.05$

313

314

### 315 **3.1.2. Retention**

316 Of the 66 enrolled patients, 58 completed the screening tools (FFQ) during the initial and  
 317 follow-up study visits, with a retention rate of 87.9%, demonstrating a high level of  
 318 participant engagement and commitment throughout the study duration (**Fig 2**).

319

320

321

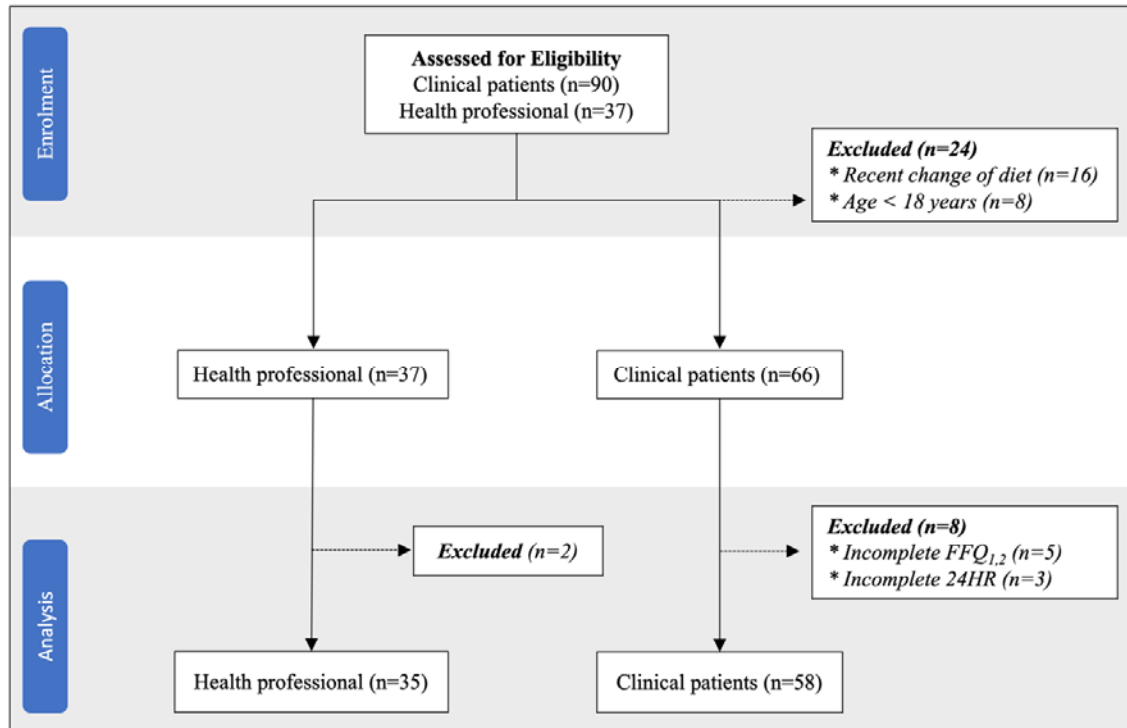

322 **Fig 2. Patient recruitment and enrolment flowchart.** FFQ: Food frequency questionnaire,  
323 24HR: 24-hour dietary recall, n: number

324

### 325 3.1.3. Adherence

326 In evaluating participant adherence, the study demonstrated a high level of compliance. Out  
327 of the 66 patients initially recruited, 58 completed all required assessments and activities,  
328 resulting in an adherence rate of approximately 87.9% (**Fig 2**). Notably, eight participants  
329 faced challenges in adhering to the study protocols, resulting in instances of non-adherence.  
330 Specifically, three participants completed the initial Food Frequency Questionnaire (FFQ) but  
331 could not proceed with the second FFQ due to work schedule constraints. Additionally, five  
332 participants completed the first 24-hour recall but encountered challenges in completing the  
333 subsequent recalls, with reasons including poor network signal ( $n=3$ ) and participants not  
334 responding ( $n=5$ ).

335

336

#### 337 **3.1.4. Completion rates and time**

338 The completion rate for the 27-item FFQ was 100% (66 patients) at the first study visit. At  
339 three weeks, the completion rate was 87.9% (58/66 patients) (**Fig 2**). The mean time to  
340 complete the FFQ was  $7.71 \pm 2.51$  minutes at the first study visit and  $7.03 \pm 2.03$  minutes at  
341 three weeks (**Table 3**). Time to complete decreased over time as patients became more  
342 familiar with the process.

343

#### 344 **3.1.5. Patients feedback**

345 Patient's perspectives on FFQ usability and efficacy are provided in **Table 4**. Most patients  
346 (96.6%) found the FFQ clear, appropriate, and easy to use. However, a minority (3.4%)  
347 reported some questions as unclear, especially on 'more than once a day' and salt intake  
348 frequency options ('never/rarely', 'Sometimes', 'Usually and 'Always'). Additionally, 10.3%  
349 expressed sensitivity to certain questions on topics like fruit intake and salt use behaviours.  
350 However, most (82.8%) were comfortable with the FFQ. For example, regarding fruit intake,  
351 one participant stated:

352

353 *"I feel uncomfortable because I don't normally eat fruit and vegetables because of financial*  
354 *constraints" regarding fruit intake" (female, 40-45 years, >5 years hypertensive).*

355

356 On salt use, another shared:

357 *"Most of my meals I bought from a food vendor, and I don't know that it is important to check*  
358 *the amount of salt in food labels" (male, 30-35 years, non-hypertensive).*

359



360 Regarding comprehensive food coverage, 6.9% noted missing items like unripe plantain, corn  
361 flour, Tofu (soybeans), and Ukwa (breadfruit). Just 1.7% reported technical difficulties  
362 influencing responses. Notably, 96.6% of participants believed that the questionnaire  
363 provided a comprehensive assessment of their food intake, highlighting its effectiveness, and  
364 an equally high percentage (96.6%) considered it useful for healthcare professionals in  
365 providing personalised nutritional support to patients.

366

367 **Table 4.** Patients feedback on the screening tool (FFQ) (*n*=58)

| Feedback responses                                       | Yes          | No           |
|----------------------------------------------------------|--------------|--------------|
|                                                          | <i>n</i> (%) | <i>n</i> (%) |
| Clarity, appropriate, and easy to use                    | 56 (96.6)    | 2 (3.4)      |
| Unclear or difficult questions                           | 6 (10.3)     | 52 (89.7)    |
| Discomfort and sensitivity in questions                  | 10 (17.2)    | 48 (82.8)    |
| Missing foods or beverages                               | 4 (6.9)      | 54 (93.1)    |
| Technical difficulties and factors influencing responses | 1 (1.7)      | 57 (98.3)    |
| Comprehensive assessment of food intake                  | 56 (96.6)    | 2 (3.4)      |
| Usefulness for clinicians                                | 56 (96.6)    | 2 (3.4)      |

368 Data are presented as: *n*= frequency, %= percentage

369

## 370 **3.2. Healthcare professional's feasibility outcomes**

### 371 **3.2.1. Healthcare professional's characteristics**

372 In total, 37 healthcare professionals enrolled in the feasibility survey of the FFQ. Thirty-five  
373 completed the survey. Two were excluded due to incomplete data (**Fig 2**). Years of experience  
374 ranged from 3 years to 20 years in practice.

375

### 376 **3.2.2. Perceived importance and current practices**

377 The survey results demonstrated the importance of dietary assessment among healthcare  
378 professionals for effective hypertension management (**Table 5**). All healthcare professionals  
379 (100%) considered dietary assessment as 'very important or important', underscoring its

380 recognition as a crucial component in hypertension prevention and care. 71.4% of healthcare  
 381 professionals reported conducting a routine dietary assessment in clinical practice  
 382 occasionally as part of hypertension management; however, a smaller proportion of  
 383 healthcare professionals conduct dietary assessments monthly (11.4%) or weekly evaluations  
 384 (11.4%), while only a minority (5.7%) never performed assessments.

385

386 **Table 5: Healthcare professional's feedback on the feasibility of integrating the FFQ in clinical practice.**

| S/N | Variables                               | Category                                     | n (%)     |
|-----|-----------------------------------------|----------------------------------------------|-----------|
| 1   | Importance of dietary assessment        | Very important                               | 29 (82.9) |
|     |                                         | Important                                    | 6 (17.1)  |
| 2   | Dietary assessment in practices         | Monthly                                      | 4 (11.4)  |
|     |                                         | Never                                        | 2 (5.7)   |
|     |                                         | Occasionally                                 | 25 (71.4) |
|     |                                         | Weekly                                       | 4 (11.4)  |
| 3   | Confidence in utilizing dietary data    | Confident                                    | 19 (54.3) |
|     |                                         | Very confident                               | 8 (22.9)  |
|     |                                         | Neutral                                      | 6 (17.1)  |
|     |                                         | Not sure                                     | 2 (5.7)   |
| 4   | Challenges in assessing food intake     | No                                           | 17 (48.6) |
|     |                                         | Yes                                          | 18 (51.4) |
| 5   | Existence of culturally-specific tools  | No specific tools                            | 13 (37.1) |
|     |                                         | Yes, but not culturally specific             | 7 (20.0)  |
|     |                                         | Not sure                                     | 14 (40.0) |
|     |                                         | Yes, culturally specific tools are available | 1 (2.9)   |
| 6   | Clarity of questions                    | Yes                                          | 34 (97.1) |
|     |                                         | No                                           | 1 (2.9)   |
| 7   | Difficulty of questions                 | No                                           | 29 (82.9) |
|     |                                         | Yes                                          | 6 (17.1)  |
| 8   | Relevance of the new dietary tool (FFQ) | Highly relevant                              | 15 (42.9) |
|     |                                         | Relevant                                     | 18 (51.4) |
|     |                                         | Neutral                                      | 1 (2.9)   |
|     |                                         | Not sure                                     | 1 (2.9)   |
| 9   | How valuable is the new tool (FFQ)      | Very valuable                                | 20 (57.1) |
|     |                                         | Valuable                                     | 14 (40.0) |
|     |                                         | Neutral                                      | 1 (2.9)   |

387 Data are presented as: n= frequency, %= percentage

388

### 389 **3.2.3. Current practices and confidence in tool usage**

390 The survey assessed the confidence level among healthcare professionals in interpreting and  
 391 applying dietary data for decisions regarding hypertension care, as outlined in **Table 5**. Most

392 (77.2%) expressed ‘confident or very confident’. However, a notable portion, 17.1%,  
393 expressed a neutral stance, while 5.7% conveyed uncertainty. These findings suggest various  
394 confidence levels among healthcare professionals in utilising dietary data. Furthermore, over  
395 half (51.4%) encountered difficulties analysing patients' dietary intake to determine  
396 hypertension risks and make dietary recommendations. This highlights the complexity  
397 involved in existing dietary assessment tools. In contrast, 48.6% did not encounter such  
398 challenges, indicating a balanced distribution of experiences among healthcare professionals.  
399 When evaluating healthcare professionals' awareness of culturally specific dietary screening  
400 or assessment tools tailored for hypertension in Nigeria, a significant majority (57.1%)  
401 indicated either the absence of such tools or noted that available tools lacked cultural  
402 specificity. Meanwhile, 40% were uncertain about the existence of any dietary assessment  
403 tools. Only a small minority (2.9%) answered that culturally specific tools exist.

404

#### 405 **3.2.4. Clarity and user-friendliness of the FFQ**

406 The results from questions examining the perceived clarity of the new dietary assessment tool  
407 are presented in **Table 5**. An overwhelming majority (97.1%) of healthcare professionals  
408 found the questions easy to understand and straightforward, indicating a high level of clarity  
409 in the questionnaire. Only a small minority (2.9%) reported difficulty, specifically with  
410 questions about salt intake behaviour, suggesting an overall positive response regarding  
411 comprehensibility. Additionally, the survey assessed whether any questions posed challenges  
412 or were unclear for participants (**Table 5**). Once again, a majority (82.9%) reported no issues,  
413 underscoring the high level of clarity and user-friendliness in the questionnaire. However, a  
414 minority (17.1%) found some questions unclear.

415

#### 416 **3.2.5. Perceived utility of the dietary assessment tool**

417 In assessing the healthcare professional's perceived relevance of the dietary tool for  
418 identifying and addressing dietary factors contributing to hypertension among patients as  
419 outlined in **Table 5**. Most healthcare professionals found it relevant (51.4%) or highly  
420 relevant (42.9%). Some were uncertain (2.9%) or neutral (2.9%). Overall, the results  
421 underscore the perceived potential of the tool for effectively targeting dietary factors  
422 associated with hypertension. Regarding the perceived value of the tool's information for  
423 formulating individualised dietary recommendations for patients, most healthcare  
424 professionals (97.1%) deemed it valuable (**Table 5**). Only a small minority expressed a  
425 neutral stance (2.9%) (**Table 5**). This indicates a consensus among healthcare professionals  
426 regarding the high value of the data obtained through the tool for tailoring dietary advice to  
427 individual patients.

428

### 429 **3.2.6. Perceived feasibility and acceptability**

430 The perception of the healthcare professionals on the feasibility and acceptability of  
431 integrating the newly introduced dietary assessment tool, the Food Frequency Questionnaire  
432 (FFQ), into their clinical workflows and patient consultations is detailed in **Table 6**. Among  
433 the healthcare professionals, a significant majority (82.9%) expressed confidence in the  
434 feasibility of integrating the tool (FFQ) into routine clinical practice. However, a small  
435 proportion (11.4%) were neutral or unfeasible (2.9%). Furthermore, in assessing the potential  
436 impacts on workflow, most healthcare professionals (85.7%) believed the integration would  
437 be feasible without disrupting established workflows. However, some uncertainty existed,  
438 with 14.3% expressing uncertainty about potential impacts and 2.9% asserting that it would  
439 be infeasible without affecting workflow. These findings collectively demonstrate an  
440 optimistic outlook on the feasibility of integrating the FFQ into the routine workflow of  
441 healthcare professionals.

442

443

444

445

446 **Table 6: Perceived implementation and challenges of the new tool**

| S/N | Variables                             | Category        | n (%)     |
|-----|---------------------------------------|-----------------|-----------|
| 1   | Perceived feasibility of integration  | No              | 1 (2.9)   |
|     |                                       | Not sure        | 5 (14.3)  |
|     |                                       | Yes             | 29 (82.9) |
| 2   | Impact on workflow                    | Feasible        | 24 (68.6) |
|     |                                       | Highly feasible | 6 (17.1)  |
|     |                                       | Neutral         | 4 (11.4)  |
|     |                                       | Not feasible    | 1 (2.9)   |
| 3   | Foreseeable challenges in integration | No              | 17 (48.6) |
|     |                                       | Not sure        | 10 (28.6) |
|     |                                       | Yes             | 8 (22.9)  |
| 4   | Likelihood of implementation          | Very likely     | 17 (48.6) |
|     |                                       | Likely          | 16 (45.7) |
|     |                                       | Neutral         | 1 (2.9)   |
|     |                                       | Very unlikely   | 1 (2.9)   |

447 Data are presented as:  $n$ = frequency, %= percentage

448

449 Moreover, the survey assessed the potential challenges that healthcare professionals foresaw  
450 in integrating the FFQ into their clinical practice (**Table 6**). Encouragingly, nearly half of the  
451 healthcare professionals (48.6%) believed there would be no discernible challenges,  
452 indicating an overall positive outlook. However, a significant portion (28.6%) expressed  
453 uncertainty, highlighting the need for comprehensive training and support programs to  
454 address potential concerns. Additionally, 22.9% of respondents anticipated challenges,  
455 underscoring the importance of proactive measures to identify and mitigate potential  
456 obstacles during the integration process.

457

458 In terms of the likelihood of successful implementation of the tool in routine clinical practice  
459 in Nigeria, the majority (94.3%) of healthcare professionals demonstrated a high degree of  
460 confidence, asserting that the implementation of the FFQ for personalised dietary counselling  
461 and assessment would 'very likely or likely', reflecting substantial confidence in the tool's

462 potential to enhance patient outcomes and contribute meaningfully to hypertension  
463 management. Only a marginal proportion (2.9%) maintained a neutral stance, indicating a  
464 need for targeted efforts to address any reservations or uncertainties. Similarly, only 2.9%  
465 deemed success to be ‘very unlikely’, further affirming the overall confidence in the potential  
466 benefits of the FFQ (**Table 6**). 94.3% of healthcare professionals indicated that the new tool  
467 is ‘likely or very likely’ to be implemented for personalised dietary counselling and  
468 evaluation. This reflects substantial confidence in the tool's potential to improve patient  
469 outcomes and meaningfully contribute to hypertension management. Only 2.9% of healthcare  
470 professionals were neutral or deemed success ‘very unlikely’.

471

### 472 **3.2.7. Healthcare professional’s feedback**

473 The qualitative feedback provided by the healthcare professionals yielded six themes that  
474 emerged from the content analysis of fragments and statements. These themes encompassed a  
475 comprehensive exploration of various aspects pertaining to screening tools, including  
476 knowledge of dietary screening tools, the effectiveness of existing screening tools, challenges  
477 in assessing dietary habits, essential features of a dietary screening tool, perceived benefits  
478 and challenges of integration of the tool, and perceived implementation and suggestions.

479

#### 480 ***Knowledge of dietary screening tools***

481 This theme, ‘knowledge of dietary screening tools,’ assessed the healthcare familiarity with  
482 alternative tailored dietary assessment tools and interventions for hypertension management.  
483 The healthcare professionals (97.1%) predominantly conveyed a lack of prior engagement  
484 with alternative dietary assessment tools (**Table 5**). Their responses consistently indicated a  
485 dearth of previous experience or utilisation of such tools, with many explicitly stating "no" or  
486 indicating a lack of familiarity. One healthcare professional stated:

487

488 *“I haven't really used any specific dietary tools before. It's quite new to me, to be honest”*

489 *(male, 40-45 years, clinician).*

490

491 Notably, 94.3% of healthcare professionals expressed interest in the new screening tool  
492 (FFQ), underscoring its perceived potential benefits, particularly its cultural adaptability  
493 (**Table 5**). Additionally, some healthcare professionals provided constructive feedback,  
494 suggesting improvements such as a more comprehensive representation of foods from  
495 northern Nigeria and enhanced functionality that does not rely on internet access. In this  
496 regard, one healthcare professional remarked:

497

498 *“I find the new screening tool quite intriguing. It seems adaptable to our cultural*  
499 *context, which is really important. However, it would be great to see more foods from*  
500 *the northern region of Nigeria included” (female, 40-45 years, clinician).*

501

### 502 ***Effectiveness of existing assessment tools***

503 The majority of healthcare professionals (97.1%) indicated a paucity or unfamiliarity with  
504 culturally tailored dietary tools for capturing indigenous foods and difficulties in quantifying  
505 some specific diets in cultural meals (**Table 5**). Furthermore, some healthcare professionals  
506 emphasised the need for a simplified tool in the form of a pamphlet or checklists with  
507 culturally adapted foods that can effectively address dietary assessment:

508

509 *“I find that the existing dietary tools don't really consider our cultural context. There's*  
510 *a gap when it comes to addressing indigenous foods, which are a significant part of our*

511 *diet. Plus, quantifying the amount of salt and other diets in our cultural dishes using*  
512 *these tools can be quite challenging” (female, 40-45 years, clinician).*

513

514 *“I firmly advocate for culturally tailored dietary tools. Take Awadu, for instance; it's*  
515 *not even accounted for in any existing dietary assessment tool. Additionally, we must*  
516 *give due consideration to culturally specific food groups in our dietary assessments”*

517 *(female, 46-50 years, clinician).*

518

519 ***Challenges in assessing dietary habits***

520 Almost half of the healthcare professionals (48.6%) expressed obstacles in evaluating and  
521 analysing patients' food intake for hypertension risk assessment and subsequent dietary  
522 recommendations. These challenges encompass difficulties in accurately quantifying  
523 culturally specific meals, unfamiliar indigenous foods, concerns about recall bias, a lack of  
524 tailored assessment tools, and patients' limited capacity to measure specific components of  
525 their food precisely. Additionally, healthcare professionals raised issues related to patient  
526 education and motivation alongside cultural beliefs, posing additional challenges in the intake  
527 of dietary data from patients:

528

529 *“In my experience, quantifying food content can be a real challenge. There are*  
530 *times when it's quite tricky to measure, and patients often struggle to accurately*  
531 *estimate the proportions of salt, fats and seasonings used in their cultural meals”*

532 *(female, 40-45 years, clinician).*

533



534 *“I find myself unfamiliar with the specific foods that patients mention when*  
535 *assessing their food intake. It's an area where I feel a bit out of my depth in*  
536 *clinical practice” (male, 40-45 years, clinician).*

537

### 538 ***Essential features of a dietary screening tool***

539 The healthcare professionals highlighted essential features they would consider crucial in a  
540 dietary screening tool for effective integration into clinical practice for assessing dietary  
541 intake in hypertension prevention and management. Firstly, they emphasised that the tool  
542 should be culturally tailored to the specific population and contain common foods in relation  
543 to specific health conditions. Secondly, the tool should be easy and quick to use, accessible,  
544 and able to capture intake and quantify processed food consumption, such as fried food or  
545 takeaway meals, fibre, salt intake, and saturated fat intake. Lastly, the healthcare  
546 professionals emphasised the tool should consider lifestyle and cultural factors that influence  
547 food choices and noted that language barriers should be addressed:

548

549 *“I believe a short dietary assessment tool should cover common food, be easy to use,*  
550 *short and culturally adaptable, and able to quantifiable content and consideration of*  
551 *portion sizes are also vital for accurate assessment” (male, 40-45 years, clinician).*

552

### 553 ***Perceived benefits and challenges of integration of the new tool***

554 A substantial majority, exceeding 90% of healthcare professionals, perceived the new  
555 screening tool as a relevant and valuable tool for assessing the food intake in patients and  
556 evaluating hypertension risk (**Table 5**). The integration of this tool into hypertension  
557 prevention and management has been identified by healthcare professionals as feasible  
558 (82.9%) and would not negatively impact workflow, conferring several benefits (**Table 7**).

559 Nevertheless, they also recognised a spectrum of possible challenges that could be associated  
560 with its integration into clinical practice in hypertension management in Nigeria. Top on the  
561 list of perceived challenges was time constraints, especially in a busy clinic, where healthcare  
562 professionals and patients may be impatient due to limited consultation time, as illustrated in  
563 **Table 7**. In this regard, one healthcare professional stated:

564

565 *In our busy clinic, both clinicians and patients can be quite impatient, especially*  
566 *during peak hours. Filling out the form might be rushed, and there's a risk that the*  
567 *dietary assessment could be skipped (male, 40-45 years, clinician).*

568

569 **Table 7: Benefits and challenges of implementing the screening tool**

| S/N | Benefits                                                                                                                                        | Challenges                                                                                                                                    |
|-----|-------------------------------------------------------------------------------------------------------------------------------------------------|-----------------------------------------------------------------------------------------------------------------------------------------------|
| 1   | Promotes healthy lifestyles and provides education on various food types and their benefits for individuals with hypertension.                  | Time constraints in busy outpatient settings may lead to increased waiting times during consultations.                                        |
| 2   | Facilitates early identification of individuals at risk of hypertension, contributing to prevention through risk factor reduction.              | Lack of patient awareness about the tool's existence and availability of the tool in patient folders may not always be ensured.               |
| 3   | Enables healthcare professionals to offer tailored dietary advice, aligning recommendations with each patient's specific needs and preferences. | Effectiveness relies on patients providing accurate dietary information, which may not always occur due to memory or reporting inaccuracies.  |
| 4   | Supports ongoing assessment and tracking of dietary components influencing hypertension, enabling timely detection of potential concerns        | Limited comprehensive research on the effects of all foods on hypertension may make it challenging to provide tailored recommendations.       |
| 5   | Assures holistic care for hypertension patients, providing detailed information about meal patterns for more effective management.              | Insufficient manpower may affect tool implementation. Accessibility to trained personnel knowledgeable about local foods may pose challenges. |
| 6   | Encourages adoption of lifestyle practices beneficial for hypertension management and fosters a patient-centered approach to care.              | Language barriers and patient literacy may hinder effective tool utilization, impacting its overall effectiveness.                            |
| 7   | Enhances speed and quality of patient care, streamlining risk assessment and progress monitoring in nutrition therapy.                          | Concerns about accurately measuring food, salt, and fat/oil intake, a critical factor in hypertension management.                             |

570

571

572 ***Perceived implementation and suggestions***

573 In addition to identifying potential challenges of integration of the new tool, healthcare  
574 professionals offered insightful suggestions to facilitate the seamless integration of the  
575 dietary assessment tool into clinical practice. They advocated for targeted advocacy efforts,

576 specifically directed towards the Ministry of Health and other health organisations, to secure  
577 support and endorsement for the implementation of the tool. Additionally, effective time  
578 management during consultations was deemed crucial, prompting suggestions such as  
579 condensing the questionnaire or streamlining the assessment process and creating a clear and  
580 simplified questionnaire, ensuring comprehensibility for individuals with varying levels of  
581 education. Language considerations were highlighted, with recommendations to translate the  
582 tool into Nigeria's three major languages to enhance accessibility and acceptance among  
583 patients. Some healthcare professionals also proposed developing the tool into a software  
584 application, a progressive step towards improved accessibility and usability for both  
585 healthcare professionals and patients.

586

587 *“I feel a streamlined questionnaire, with clear language, is vital for everyone at*  
588 *different education levels and translating the tool into the three major languages in*  
589 *Nigeria will enhance its accessibility among the patient population” (male, 40-45*  
590 *years, clinician).*

591

#### 592 **4. Discussion**

593 The present study explored the feasibility of integrating a validated dietary screening tool  
594 (Food Frequency Questionnaire) into clinical practice for dietary assessment and prevention  
595 of hypertension in Nigeria. This feasibility study provides important preliminary data on the  
596 potential adoption and utilisation of a tailored 27-item food frequency questionnaire (FFQ)  
597 for dietary assessment to prevent and manage hypertension in Nigeria. The results indicate an  
598 overall positive reception of the tool among patients and healthcare professionals. The high  
599 completion rates, satisfaction, and perceived utility support the acceptability and promise of  
600 the tool.

601

602 **4.1. Acceptability and user engagement**

603 The high initial completion rate of 100% and 87.9% at three weeks far exceeds rates observed  
604 in similar feasibility studies involving FFQs, which typically ranged from 70-90% (45-47).  
605 This high level of engagement indicates a strong acceptance among patients and aligns with  
606 another study with an 85% rate in a 2018 web based FFQ validation trial (47). Furthermore,  
607 the high retention rate of 88% compares favourably to prior FFQ trials, which retained 75-  
608 85% of patients enrolled in the study (48), demonstrating a high level of acceptability of the  
609 screening tools. According to a review by Hebert et al., retention rates above 80% are  
610 considered robust for dietary assessment studies, signifying a solid commitment from the  
611 patients for the studies (49). Therefore, the high retention rate achieved in this study  
612 favourably compares to previous feasibility studies involving FFQ, which retained 75-85% of  
613 participants (50). These collective findings suggest a strong acceptance and compliance with  
614 the feasibility study protocol.

615

616 The average time taken to complete the trial, approximately < 8 minutes (7.37 minutes),  
617 aligns with the goal of developing an efficient tool, which is consistent with the 5-15 minutes  
618 range reported in previous studies focusing on the feasibility and validation of FFQ (47, 48,  
619 51, 52). Kristal et al. emphasised the importance of short completion times, defining them as  
620  $\leq 15$  minutes in order to minimise participant burden (50). The slight reduction from 7.42 to  
621 7.02 minutes at the second administration suggests that patients find the process  
622 undemanding and that it can be completed more quickly once it is familiar. In many  
623 healthcare facilities across Nigeria, patients typically experience hospital waiting times  
624 ranging from 83.7 to 144 minutes with a mean pre-consultation interval of 48.7 minutes (53-  
625 55). Therefore, across most healthcare settings in Nigeria, the implementation of this

626 screening tool, which requires less than 8 minutes for completion, is unlikely to disrupt  
627 clinical workflow. The overwhelmingly positive feedback from patients, with 96.6%  
628 expressing satisfaction, mirrors the result observed in FFQ feasibility studies reporting  
629 satisfaction rates ranging from 70-90% (56). This high satisfaction indicates a positive user  
630 experience with an easily understandable, user-friendly format.

631

#### 632 **4.2. Clinical need and perceived utility**

633 The consensus among healthcare professionals regarding the significance of dietary  
634 assessment in hypertension management is consistent with well-established evidence on the  
635 association between dietary factors and blood pressure (12, 57-60). However, the reported  
636 infrequency of assessments in routine practice supports the need for tailored tools. Previous  
637 studies also highlight a gap between recommended lifestyle counselling and actual clinical  
638 practice implementation (61-64). The anticipated benefits from the new screening tool,  
639 including education, early risk detection, personalised guidance, monitoring, and patient  
640 management, align with the multifaceted utility of such a tool. The study by Kristal et al.  
641 further emphasised the importance of healthcare professionals' confidence in FFQ data for  
642 effective counselling, which is a pivotal factor in the clinical adoption (50). Therefore, the  
643 positive perceptions of utility among this sample of healthcare professionals are promising.  
644 Additionally, the fact that 97.1% of healthcare professionals regarded the screening tool  
645 (FFQ) as valuable for providing individualised dietary recommendations further affirms its  
646 perceived clinical relevance.

647

#### 648 **4.3. Cultural appropriateness**

649 The common view among healthcare professionals that existing dietary assessment tools or  
650 methods lack cultural specificity substantiates existing conclusions that current approaches

651 often inadequately capture the dietary habits of ethnic minority populations (65-68). The  
652 healthcare professionals emphasised the critical need to account for indigenous foods and  
653 quantify components, aligning with previous studies that demonstrated how traditional FFQs  
654 frequently misrepresent the dietary intake of ethnic minority groups (24, 69, 70). Thus, there  
655 is an evident niche for culturally tailored tools like the FFQ that this tool will evaluate in the  
656 follow-up study.

657

#### 658 **4.4. Implementation considerations**

659 Over half of healthcare professionals expressed full confidence in utilising FFQ data, a factor  
660 previously identified by Kristal et al. as facilitating implementation (50). However,  
661 enhancement through training could promote broader confidence. Supporting healthcare  
662 professionals in applying FFQ insights may be warranted based on requests for guidance on  
663 counselling applications. While healthcare professionals acknowledged time constraints as a  
664 challenge, most believed implementation was feasible without causing significant disruption  
665 to workflow, aligning with studies demonstrating minimal time burdens associated with FFQ  
666 administration (27, 69).

667

668 Almost half of healthcare professionals foresaw no significant implementation challenges,  
669 reflecting a sense of optimism. However, some uncertainty remained regarding potential  
670 barriers related to patient factors, such as health literacy. Several reviews have highlighted the  
671 importance of user-centred design and a careful introduction, emphasising the influence of  
672 patient acceptance on the success of the FFQ (52, 71-73). Thus, a participatory  
673 implementation approach that engages all stakeholders could prove beneficial for the  
674 successful integration and implementation of the FFQ into clinical practice in Nigeria (74-  
675 77).

676

#### 677 **4.5. Strengths and Limitations**

678 This study provides promising evidence supporting the FFQ as an acceptable, useful, and  
679 culturally appropriate tool for the dietary assessment and prevention of hypertension in  
680 Nigeria. This study demonstrates a comprehensive approach by employing both quantitative  
681 metrics and qualitative feedback, providing a multifaceted assessment of the feasibility of the  
682 FFQ from the perspectives of both patients and healthcare professionals. The pragmatic  
683 clinical environment enhances the applicability of the findings to the real-world context of  
684 hypertension care in Nigeria. The examination of numerous metrics provides comprehensive  
685 insights into retention, adherence, completion, relevance, acceptability, and anticipated  
686 integration barriers. Importantly, gathering user-centred feedback from providers allowed for  
687 evidence-based refinements that address their specific needs and priorities. The convergence  
688 of quantitative and qualitative findings offers complementary perspectives, enriching the  
689 overall feasibility evaluation.

690

691 Nonetheless, some limitations warrant acknowledgement. The single-centre design restricts  
692 generalizability to other Nigerian regions and clinical settings. Unlike past research, no  
693 comparative FFQ analysis occurred. Additionally, this study assessed perceived feasibility  
694 rather than actual pre-post implementation challenges. While potential barriers to integration  
695 were anticipated, the intricate details of real-world workflow integration remain  
696 underexplored. Furthermore, only perception-based, rather than objective data on clinical  
697 utility and patient outcomes, was captured. Finally, a longitudinal follow-up to assess whether  
698 acceptability endures over time was not conducted.

699

#### 700 **4.6. Relevance to clinical practice**

701 The findings of this feasibility study bear important implications for the potential integration  
702 of the FFQ as a dietary assessment tool within clinical practice. The high completion rates,  
703 coupled with positive user feedback, suggest a promising acceptance of the tool among  
704 patients and healthcare professionals. Moreover, the minimal time investment required for  
705 FFQ completion aligns with the practical demands of a clinical setting. The identified  
706 challenges and recommendations provided by healthcare professionals offer valuable insights  
707 for refining the tool's implementation process. These considerations are pivotal in guiding  
708 future steps towards the effective incorporation of the screening tool (FFQ) into routine  
709 clinical practice, ensuring its seamless integration and utility in the dietary assessment and  
710 prevention of hypertension among the Nigerian patient population.

711

## 712 **Conclusions**

713 This study provides initial promising evidence to support the screening tool (FFQ) as an  
714 acceptable, useful, and culturally appropriate dietary assessment tool for the prevention and  
715 dietary management of hypertension in Nigeria. Patients demonstrated high engagement.  
716 Healthcare professionals in Nigeria affirmed the value of care this tool could address. While  
717 implementation considerations exist, optimism prevails. Further validation and careful  
718 introduction are warranted to facilitate optimal FFQ adoption and impact. Overall, the  
719 feasibility outcomes justify progressed research on this FFQ as a practical means to improve  
720 dietary assessment practices to prevent and control hypertension better in Nigeria.

721

## 722 **Acknowledgement**

723 We extend our deepest gratitude to the patients and esteemed healthcare professionals of  
724 Rivers State University Teaching Hospital, Port Harcourt, Nigeria, whose invaluable  
725 participation and insights were instrumental in the successful execution of this study. We  
726 would like to extend special thanks to Drs. Nkiru Ahiakwo, Ifeoma Enyoghasim, Eneyo  
727 Nelly, Comfort Imarhiagbe, Janny Ikurayeke, Valentine Kogbara, Titi Owen, Dickson



728 Christian, Anwuri Grend, Anita Oweredaba, Ununuma Oguzor, Josephine Sokolo of the  
729 Family Medicine Dept RSUTH and Drs. Ibieneiyi, Edith Reuben, Elile Okpara, Imaobong  
730 Nonju, Siya George-Batubo, Chinnasa Nzokurum, and Prof. Amah-Tariah for their generous  
731 provision of qualitative feedback on the screening tool (FFQ). Their contributions  
732 significantly enriched the quality of our research. Furthermore, we express our sincere  
733 appreciation to the management of the hospital and the Department of Internal Medicine and  
734 Family Medicine for affording us the platform and granting ethical approval, which were  
735 pivotal in facilitating the smooth progress of this study.

736

### 737 **Authors' Contributions**

738 NPB and MAZ collaborated on the research methodology design. NPB led the trial, and  
739 NMN and CAA provided technical support. NPB led the analysis and prepared the first draft.  
740 MAZ and JBM provided analytical expertise. MAZ, JBM, and CIA provided critical  
741 feedback. NPB revised the manuscript. All authors approved the final manuscript.

742

### 743 **Funding**

744 This study was funded by the Tertiary Education Trust Fund (TETFund) of Nigeria. MAZ is  
745 currently funded by Wellcome Trust (217446/Z/19/Z). The funders do not have any role in  
746 any aspect of this study.

747

748 **Conflicts of Interest:** None declared.

749

### 750 **References**

- 751 1. Forouzanfar MH, Liu P, Roth GA, Ng M, Biryukov S, Marczak L, et al. Global Burden  
752 of Hypertension and Systolic Blood Pressure of at Least 110 to 115 mm Hg, 1990-  
753 2015. *JAMA*. 2017;317(2):165-82.
- 754 2. Dzudie A, Kengne AP, Muna WF, Ba H, Menanga A, Kouam Kouam C, et al.  
755 Prevalence, awareness, treatment and control of hypertension in a self-selected sub-  
756 Saharan African urban population: a cross-sectional study. *BMJ Open*. 2012;2(4).
- 757 3. Ataklte F, Erqou S, Kaptoge S, Taye B, Echouffo-Tcheugui JB, Kengne AP. Burden of  
758 undiagnosed hypertension in sub-saharan Africa: a systematic review and meta-  
759 analysis. *Hypertension*. 2015;65(2):291-8.
- 760 4. Odili AN, Chori BS, Danladi B, Nwakile PC, Okoye IC, Abdullahi U, et al. Prevalence,  
761 Awareness, Treatment and Control of Hypertension in Nigeria: Data from a Nationwide  
762 Survey 2017. *Glob Heart*. 2020;15(1):47.
- 763 5. Akinlua JT, Meakin R, Umar AM, Freemantle N. Current Prevalence Pattern of  
764 Hypertension in Nigeria: A Systematic Review. *PLoS One*. 2015;10(10):e0140021.
- 765 6. World Health Organization. The Global Health Observatory (GHO). Prevalence of  
766 hypertension among adults aged 30-79 years, age-standardized 2021 [Available from:

- 767 [https://www.who.int/data/gho/data/indicators/indicator-details/GHO/prevalence-of-](https://www.who.int/data/gho/data/indicators/indicator-details/GHO/prevalence-of-hypertension-among-adults-aged-30-79-years)  
768 [hypertension-among-adults-aged-30-79-years.](https://www.who.int/data/gho/data/indicators/indicator-details/GHO/prevalence-of-hypertension-among-adults-aged-30-79-years)
- 769 7. Oguoma VM, Nwose EU, Skinner TC, Digban KA, Onyia IC, Richards RS. Prevalence  
770 of cardiovascular disease risk factors among a Nigerian adult population: relationship  
771 with income level and accessibility to CVD risks screening. *BMC Public Health*.  
772 2015;15:397.
  - 773 8. Adeloye D, Owolabi EO, Ojji DB, Auta A, Dewan MT, Olanrewaju TO, et al.  
774 Prevalence, awareness, treatment, and control of hypertension in Nigeria in 1995 and  
775 2020: A systematic analysis of current evidence. *J Clin Hypertens (Greenwich)*.  
776 2021;23(5):963-77.
  - 777 9. Whelton PK, Carey RM, Aronow WS, Casey DE, Jr., Collins KJ, Dennison  
778 Himmelfarb C, et al. 2017  
779 ACC/AHA/AAPA/ABC/ACPM/AGS/APhA/ASH/ASPC/NMA/PCNA Guideline for  
780 the Prevention, Detection, Evaluation, and Management of High Blood Pressure in  
781 Adults: Executive Summary: A Report of the American College of  
782 Cardiology/American Heart Association Task Force on Clinical Practice Guidelines.  
783 *Hypertension*. 2018;71(6):1269-324.
  - 784 10. Zhou B, Perel P, Mensah GA, Ezzati M. Global epidemiology, health burden and  
785 effective interventions for elevated blood pressure and hypertension. *Nat Rev Cardiol*.  
786 2021;18(11):785-802.
  - 787 11. Zhou B, Bentham J, Di Cesare M, Bixby H, Danaei G, Cowan MJ, ... & , et al.  
788 Worldwide trends in blood pressure from 1975 to 2015: a pooled analysis of 1479  
789 population-based measurement studies with 19.1 million participants. *Lancet*.  
790 2017;389(10064):37-55.
  - 791 12. Batubo NP, Moore JB, Zulyniak MA. Dietary factors and hypertension risk in West  
792 Africa: a systematic review and meta-analysis of observational studies. *J Hypertens*.  
793 2023;41(9):1376-88.
  - 794 13. Ojji D, Nigeria Sodium Study T. Developing long-term strategies to reduce excess salt  
795 consumption in Nigeria. *Eur Heart J*. 2022;43(13):1277-9.
  - 796 14. Oyebode O, Oti S, Chen YF, Lilford RJ. Salt intakes in sub-Saharan Africa: a  
797 systematic review and meta-regression. *Popul Health Metr*. 2016;14:1.
  - 798 15. Mustapha, Mudashiru A, Fakokunde, Olubamiji T, Awolusi, Dele O, editors. *The Quick  
799 Service Restaurant Business in Nigeria: Exploring the Emerging Opportunity for  
800 Entrepreneurial Development and Growth*2014.
  - 801 16. Ogah OS, Okpechi I, Chukwuonye, II, Akinyemi JO, Onwubere BJ, Falase AO, et al.  
802 Blood pressure, prevalence of hypertension and hypertension related complications in  
803 Nigerian Africans: A review. *World J Cardiol*. 2012;4(12):327-40.
  - 804 17. Schmidt BM, Durao S, Toews I, Bavuma CM, Hohlfeld A, Nury E, et al. Screening  
805 strategies for hypertension. *Cochrane Database Syst Rev*. 2020;5(5):CD013212.
  - 806 18. David L. Streiner, Geoffrey R. Norman, John Cairney. *Health measurement scales. A  
807 practical guide to their development and use*. 5 ed: University Press, Oxford.; 2015. 432  
808 p.
  - 809 19. Liberati A, Altman DG, Tetzlaff J, Mulrow C, Gotzsche PC, Ioannidis JP, et al. The  
810 PRISMA statement for reporting systematic reviews and meta-analyses of studies that  
811 evaluate health care interventions: explanation and elaboration. *PLoS Med*.  
812 2009;6(7):e1000100.
  - 813 20. Wilson JM, Jungner YG. [Principles and practice of mass screening for disease]. *Bol  
814 Oficina Sanit Panam*. 1968;65(4):281-393.
  - 815 21. Lee RD, Nieman DC. *Nutritional assessment*. 6 ed: McGraw-Hill, New York, NY;,  
816 2013.

- 817 22. Murphy SP, Wilkens LR, Hankin JH, Foote JA, Monroe KR, Henderson BE, et al.  
818 Comparison of two instruments for quantifying intake of vitamin and mineral  
819 supplements: a brief questionnaire versus three 24-hour recalls. *Am J Epidemiol.*  
820 2002;156(7):669-75.
- 821 23. Willett WC, Sampson L, Stampfer MJ, Rosner B, Bain C, Witschi J, et al.  
822 Reproducibility and validity of a semiquantitative food frequency questionnaire. *Am J*  
823 *Epidemiol.* 1985;122(1):51-65.
- 824 24. Goulet J, Nadeau G, Lapointe A, Lamarche B, Lemieux S. Validity and reproducibility  
825 of an interviewer-administered food frequency questionnaire for healthy French-  
826 Canadian men and women. *Nutr J.* 2004;3:13.
- 827 25. Bosu WK. An overview of the nutrition transition in West Africa: implications for non-  
828 communicable diseases. *Proc Nutr Soc.* 2015;74(4):466-77.
- 829 26. Herman CR, Gill HK, Eng J, Fajardo LL. Screening for preclinical disease: test and  
830 disease characteristics. *AJR Am J Roentgenol.* 2002;179(4):825-31.
- 831 27. Paxton AE, Strycker LA, Toobert DJ, Ammerman AS, Glasgow RE. Starting the  
832 conversation performance of a brief dietary assessment and intervention tool for health  
833 professionals. *Am J Prev Med.* 2011;40(1):67-71.
- 834 28. Cahill E, Schmidt SR, Henry TL, Kumar G, Berney S, Bussey-Jones J, et al. Qualitative  
835 research study on addressing barriers to healthy diet among low-income individuals at  
836 an urban, safety-net hospital. *BMJ Nutr Prev Health.* 2020;3(2):383-6.
- 837 29. Ball LE, Hughes RM, Leveritt MD. Nutrition in general practice: role and workforce  
838 preparation expectations of medical educators. *Aust J Prim Health.* 2010;16(4):304-10.
- 839 30. Chan AW, Tetzlaff JM, Altman DG, Laupacis A, Gotzsche PC, Krleza-Jeric K, et al.  
840 SPIRIT 2013 statement: defining standard protocol items for clinical trials. *Ann Intern*  
841 *Med.* 2013;158(3):200-7.
- 842 31. Portz JD, Bayliss EA, Bull S, Boxer RS, Bekelman DB, Gleason K, et al. Using the  
843 Technology Acceptance Model to Explore User Experience, Intent to Use, and Use  
844 Behavior of a Patient Portal Among Older Adults With Multiple Chronic Conditions:  
845 Descriptive Qualitative Study. *J Med Internet Res.* 2019;21(4):e11604.
- 846 32. Federal Ministry of Health. National Nutritional Guideline On Non-Communicable  
847 Disease Prevention, Control and Management In: Federal Ministry of Health A, editor.  
848 2014. p. 62.
- 849 33. Flesch R. A new readability yardstick. *J Appl Psychol.* 1948;32(3):221-33.
- 850 34. Willett W. Foreword. The validity of dietary assessment methods for use in  
851 epidemiologic studies. *Br J Nutr.* 2009;102 Suppl 1:S1-2.
- 852 35. Adebamowo SN, Eseyin O, Yilme S, Adeyemi D, Willett WC, Hu FB, et al. A Mixed-  
853 Methods Study on Acceptability, Tolerability, and Substitution of Brown Rice for White  
854 Rice to Lower Blood Glucose Levels among Nigerian Adults. *Front Nutr.* 2017;4:33.
- 855 36. Steinemann N, Grize L, Ziesemer K, Kauf P, Probst-Hensch N, Brombach C. Relative  
856 validation of a food frequency questionnaire to estimate food intake in an adult  
857 population. *Food Nutr Res.* 2017;61(1):1305193.
- 858 37. Mertens E, Kuijsten A, Geleijnse JM, Boshuizen HC, Feskens EJM, Van't Veer P. FFQ  
859 versus repeated 24-h recalls for estimating diet-related environmental impact. *Nutr J.*  
860 2019;18(1):2.
- 861 38. Hennink M, Kaiser BN. Sample sizes for saturation in qualitative research: A  
862 systematic review of empirical tests. *Soc Sci Med.* 2022;292:114523.
- 863 39. Thabane L, Ma J, Chu R, Cheng J, Ismaila A, Rios LP, et al. A tutorial on pilot studies:  
864 the what, why and how. *BMC Med Res Methodol.* 2010;10:1.
- 865 40. Gupta KK, Attri JP, Singh A, Kaur H, Kaur G. Basic concepts for sample size  
866 calculation: Critical step for any clinical trials! *Saudi J Anaesth.* 2016;10(3):328-31.

- 867 41. R Core Team. A language and environment for statistical computing. R Foundation for  
868 Statistical Computing. 4.3.1 ed: Vienna, Austria; 2020.
- 869 42. Lumivero. QSR International. NVivo (Version 14). NVivo (Version 14) ed2020.
- 870 43. Forman J, Damschroder L. Qualitative Content Analysis. Empirical Research for  
871 Bioethics: A Primer. Oxford, UK: Elsevier Publishing; 2008.
- 872 44. Vaismoradi M, Turunen H, Bondas T. Content analysis and thematic analysis:  
873 Implications for conducting a qualitative descriptive study. Nurs Health Sci.  
874 2013;15(3):398-405.
- 875 45. Marks GC, Hughes MC, van der Pols JC. Relative validity of food intake estimates  
876 using a food frequency questionnaire is associated with sex, age, and other personal  
877 characteristics. J Nutr. 2006;136(2):459-65.
- 878 46. Subar AF, Potischman N, Dodd KW, Thompson FE, Baer DJ, Schoeller DA, et al.  
879 Performance and Feasibility of Recalls Completed Using the Automated Self-  
880 Administered 24-Hour Dietary Assessment Tool in Relation to Other Self-Report Tools  
881 and Biomarkers in the Interactive Diet and Activity Tracking in AARP (IDATA) Study.  
882 J Acad Nutr Diet. 2020;120(11):1805-20.
- 883 47. Park Y, Dodd KW, Kipnis V, Thompson FE, Potischman N, Schoeller DA, et al.  
884 Comparison of self-reported dietary intakes from the Automated Self-Administered 24-  
885 h recall, 4-d food records, and food-frequency questionnaires against recovery  
886 biomarkers. Am J Clin Nutr. 2018;107(1):80-93.
- 887 48. Kristal AR, Feng Z, Coates RJ, Oberman A, George V. Associations of race/ethnicity,  
888 education, and dietary intervention with the validity and reliability of a food frequency  
889 questionnaire: the Women's Health Trial Feasibility Study in Minority Populations. Am  
890 J Epidemiol. 1997;146(10):856-69.
- 891 49. Hebert JR, Clemow L, Pbert L, Ockene IS, Ockene JK. Social desirability bias in  
892 dietary self-report may compromise the validity of dietary intake measures. Int J  
893 Epidemiol. 1995;24(2):389-98.
- 894 50. Kristal AR, Kolar AS, Fisher JL, Plascak JJ, Stumbo PJ, Weiss R, et al. Evaluation of  
895 web-based, self-administered, graphical food frequency questionnaire. J Acad Nutr  
896 Diet. 2014;114(4):613-21.
- 897 51. Dehghan M, del Cerro S, Zhang X, Cuneo JM, Linetzky B, Diaz R, et al. Validation of  
898 a semi-quantitative Food Frequency Questionnaire for Argentinean adults. PLoS One.  
899 2012;7(5):e37958.
- 900 52. Illner AK, Freisling H, Boeing H, Huybrechts I, Crispim SP, Slimani N. Review and  
901 evaluation of innovative technologies for measuring diet in nutritional epidemiology.  
902 Int J Epidemiol. 2012;41(4):1187-203.
- 903 53. Oche M, Adamu H. Determinants of patient waiting time in the general outpatient  
904 department of a tertiary health institution in north Western Nigeria. Ann Med Health Sci  
905 Res. 2013;3(4):588-92.
- 906 54. Ajayi IO. Patients' waiting time at an outpatient clinic in Nigeria--can it be put to better  
907 use? Patient Educ Couns. 2002;47(2):121-6.
- 908 55. Abah V. O. Hospital Waiting Time, Satisfaction with Services and Patient Arrival  
909 Patterns among Primary Care Attendees in a Tertiary Hospital: The Need for Time  
910 Specific Appointment Systems. IOSR Journal of Dental and Medical Sciences  
911 2021;20(3):14-27.
- 912 56. Jackson KA, Byrne NM, Magarey AM, Hills AP. Minimizing random error in dietary  
913 intakes assessed by 24-h recall, in overweight and obese adults. Eur J Clin Nutr.  
914 2008;62(4):537-43.

- 915 57. Appel LJ, Moore TJ, Obarzanek E, Vollmer WM, Svetkey LP, Sacks FM, et al. A  
916 clinical trial of the effects of dietary patterns on blood pressure. *New England journal*  
917 *of medicine*. 1997;336(16):1117-24.
- 918 58. Sacks FM, Svetkey LP, Vollmer WM, Appel LJ, Bray GA, Harsha D, et al. Effects on  
919 blood pressure of reduced dietary sodium and the Dietary Approaches to Stop  
920 Hypertension (DASH) diet. *New England journal of medicine*. 2001;344(1):3-10.
- 921 59. Filippou CD, Tsioufis CP, Thomopoulos CG, Mihas CC, Dimitriadis KS, Sotiropoulou  
922 LI, et al. Dietary Approaches to Stop Hypertension (DASH) Diet and Blood Pressure  
923 Reduction in Adults with and without Hypertension: A Systematic Review and Meta-  
924 Analysis of Randomized Controlled Trials. *Adv Nutr*. 2020;11(5):1150-60.
- 925 60. Bharati R, Kovach KA, Bonnet JP, Sayess P, Polk E, Harvey K, et al. Incorporating  
926 Lifestyle Medicine Into Primary Care Practice: Perceptions and Practices of Family  
927 Physicians. *Am J Lifestyle Med*. 2023;17(5):704-16.
- 928 61. Clarke CA, Hauser ME. Lifestyle Medicine: A Primary Care Perspective. *J Grad Med*  
929 *Educ*. 2016;8(5):665-7.
- 930 62. Joseph RP, Daniel CL, Thind H, Benitez TJ, Pekmezi D. Applying Psychological  
931 Theories to Promote Long-Term Maintenance of Health Behaviors. *Am J Lifestyle*  
932 *Med*. 2016;10(6):356-68.
- 933 63. Levine DM, Green LW, Deeds SG, Chwalow J, Russell RP, Finlay J. Health education  
934 for hypertensive patients. *JAMA*. 1979;241(16):1700-3.
- 935 64. Lianov L, Johnson M. Physician competencies for prescribing lifestyle medicine.  
936 *JAMA*. 2010;304(2):202-3.
- 937 65. Kruger R, Stonehouse W, von Hurst PR, Coad J. Combining food records with in-depth  
938 probing interviews improves quality of dietary intake reporting in a group of South  
939 Asian women. *Aust N Z J Public Health*. 2012;36(2):135-40.
- 940 66. Blumenthal JA, Babyak MA, Sherwood A, Craighead L, Lin PH, Johnson J, et al.  
941 Effects of the dietary approaches to stop hypertension diet alone and in combination  
942 with exercise and caloric restriction on insulin sensitivity and lipids. *Hypertension*.  
943 2010;55(5):1199-205.
- 944 67. Bricarello LP, de Almeida Alves M, Retondario A, de Moura Souza A, de Vasconcelos  
945 FAG. DASH diet (Dietary Approaches to Stop Hypertension) and overweight/obesity in  
946 adolescents: The ERICA study. *Clin Nutr ESPEN*. 2021;42:173-9.
- 947 68. Sedgwick P. Cross sectional studies: advantages and disadvantages. *BMJ : British*  
948 *Medical Journal*. 2014;348:g2276.
- 949 69. Hu FB, Stampfer MJ, Rimm E, Ascherio A, Rosner BA, Spiegelman D, et al. Dietary  
950 fat and coronary heart disease: a comparison of approaches for adjusting for total  
951 energy intake and modeling repeated dietary measurements. *Am J Epidemiol*.  
952 1999;149(6):531-40.
- 953 70. Svetkey LP, Simons-Morton DG, Proschan MA, Sacks FM, Conlin PR, Harsha D, et al.  
954 Effect of the dietary approaches to stop hypertension diet and reduced sodium intake on  
955 blood pressure control. *J Clin Hypertens (Greenwich)*. 2004;6(7):373-81.
- 956 71. Soguel L, Vaucher C, Bengough T, Burnand B, Desroches S. Knowledge Translation  
957 and Evidence-Based Practice: A Qualitative Study on Clinical Dietitians' Perceptions  
958 and Practices in Switzerland. *J Acad Nutr Diet*. 2019;119(11):1882-9.
- 959 72. Moutou KE, England C, Gutteridge C, Toumpakari Z, McArdle PD, Papadaki A.  
960 Exploring dietitians' practice and views of giving advice on dietary patterns to patients  
961 with type 2 diabetes mellitus: A qualitative study. *J Hum Nutr Diet*. 2022;35(1):179-90.
- 962 73. Baranowski T, Willett W. 4924-Hour Recall and Diet Record Methods. *Nutritional*  
963 *Epidemiology*: Oxford University Press; 2012. p. 0.

- 964 74. Ammerman AS, DeVellis RF, Carey TS, Keyserling TC, Strogatz DS, Haines PS, et al.  
965 Physician-based diet counseling for cholesterol reduction: current practices,  
966 determinants, and strategies for improvement. *Prev Med.* 1993;22(1):96-109.  
967 75. Damschroder LJ, Aron DC, Keith RE, Kirsh SR, Alexander JA, Lowery JC. Fostering  
968 implementation of health services research findings into practice: a consolidated  
969 framework for advancing implementation science. *Implement Sci.* 2009;4:50.  
970 76. Lemon SC, Zapka J, Li W, Estabrook B, Rosal M, Magner R, et al. Step ahead a  
971 worksite obesity prevention trial among hospital employees. *American journal of*  
972 *preventive medicine.* 2010;38(1):27-38.  
973 77. Peters DH, Adam T, Alonge O, Agyepong IA, Tran N. Implementation research: what it  
974 is and how to do it. *BMJ.* 2013;347:f6753.

975

976

977

978 **Supporting information:**

979 **S1 Table.** Food frequency questionnaire

980
